# Supplementary material for: Psychometric properties of Turkish version of the adult vaccine literacy scale
Source: Research Square preprint supplement (doi:10.21203/rs.3.rs-8555513/v1), 2026-02-17
Supplement: Supplementary file 1 [file 098059415c0a5cf798fe6929.docx]

**ADULT VACCINE LITERACY SCALE**

| **No** |  |  | | | |
| --- | --- | --- | --- | --- | --- |
|  | READING THE MATERIAL: (choose only one answer for each question) | 4- Never | 3- Rarely | 2-Sometimes | 1-Often |
| 1 | Did you have difficulty reading any material (articles or images) related to vaccines? |  |  |  |  |
| 2 | Did you encounter unfamiliar words while reading an article about vaccines? |  |  |  |  |
| 3 | Did you have difficulty understanding written information related to vaccination? |  |  |  |  |
| 4 | Did you need more time to understand vaccination-related texts? |  |  |  |  |
| 5 | Did you need help from someone, or wish to have someone, to help you understand vaccination-related texts? |  |  |  |  |

| **No** |  |  | | | |
| --- | --- | --- | --- | --- | --- |
|  | WHEN SEARCHING INFORMATION:  (choose only one answer for each question) | 1- Never | 2- Rarely | 3- Sometimes | 4-Often |
| 6 | When searching for information about vaccination, did you consult more than one source? |  |  |  |  |
| 7 | Were you able to find the vaccination-related information you were looking for? |  |  |  |  |
| 8 | Did you understand the vaccination-related information you found? |  |  |  |  |
| 9 | Did you have the opportunity to use the vaccination-related information you found? |  |  |  |  |
| 10 | Did you discuss the information you obtained about vaccines with your doctor or with other people? |  |  |  |  |
| 11 | Did you consider whether the information you obtained about vaccines was relevant to your own situation? |  |  |  |  |
| 12 | Did you think that the sources from which you obtained information about vaccines were reliable? |  |  |  |  |
| 13 | Did you check whether the information you obtained about vaccines was accurate? |  |  |  |  |
| 14 | Did you obtain any useful information that influenced your decision to get vaccinated? |  |  |  |  |
